# Supplementary material for: Species identification based on a semi-diagnostic marker: Evaluation of a simple conchological test for distinguishing blue mussels Mytilus edulis L. and M. trossulus Gould
Source: PLoS One. 2021 Jul 23;16(7):e0249587. doi: 10.1371/journal.pone.0249587 (PMC8301678; doi:10.1371/journal.pone.0249587)
Supplement: S1 Table — (XLSX) [file pone.0249587.s005.xlsx]

## Sheet: Sheet1
S1 Table. Information about samples from contact zones between M. edulis and M. trossulus
Number	Locality	Sample code	Coordinates N, E	Sea	Region	Sample set	Sampling year	Local salinity	Habitat	N	Ptros	PT	P(T|tros)	P(E|edu)	P(tros|T)	P(edu|E)	Shell length	Genetic markers	Source of genetic data	Source of morphologic data		samples used for calibration of probability calculators
								(5-30 ppt - Brackish, >30 ppt - Saline)					Sensitivity	Specificity	PPV	NPV	range (mean length), mm
1	Abram Mys	Ab.16	68.982190, 33.028131	Barents Sea	Kola Bay	BL	2016	Brackish	tidal	45	0.4	0.288889	0.611111	0.925926	0.846154	0.78125	11.9 — 50.1 (28.27)	4 allozymes	this study	this study		used for calibrating of "genotype by morphotype calculator"
2	Belokamenka	Be.16	69.078978, 33.180997	Barents Sea	Kola Bay	BL	2016	Brackish	tidal	66	0.318182	0.30303	0.666667	0.866667	0.7	0.847826	10.5 — 54.2 (30.86)	4 allozymes	this study	this study
3	Fadeev Ruchey	FR.14	68.904612, 33.055684	Barents Sea	Kola Bay	BL	2014	Brackish	tidal	55	0.290909	0.236364	0.5625	0.897436	0.692308	0.833333	17.8 — 61 (38.38)	4 allozymes	this study	this study
4	Mishukovo	Mi.16	69.046161, 33.041935	Barents Sea	Kola Bay	BL	2016	Brackish	tidal	85	0.776471	0.494118	0.621212	0.947368	0.97619	0.418605	8.3 — 53.2 (21.90)	4 allozymes	this study	this study
5	Novy Most	NM1.08	68.904723, 33.026324	Barents Sea	Kola Bay	BL	2008	Brackish	tidal	50	0.36	0.4	0.888889	0.875	0.8	0.933333	13.4 — 63.9 (32.45)	4 allozymes	this study	this study
6	Griaznaya Guba	Sev.17	69.063377, 33.264443	Barents Sea	Kola Bay	BL	2017	Brackish	tidal	54	0.5	0.388889	0.724138	1	1	0.757576	11.2 — 44.9 (29.21)	4 allozymes	this study	this study		used for calibrating of "genotype by morphotype calculator"
7	Novy Most	NM2.08	68.906931, 33.027402	Barents Sea	Kola Bay	BL	2008	Brackish	tidal	37	0	0	-	1	-	1	18 — 45.5 (34.11)	4 allozymes	this study	this study		used for calibrating of "Ptros by PT calculator"; used for calibrating of "lazy Ptros by PT calculator"
8	Belokamenka	Be.05	69.078978, 33.180997	Barents Sea	Kola Bay	BL	2005	Brackish	tidal	50	0.980392	0.941176	0.94	0	0.979167	0	10.2 — 74.7 (29.94)	4 allozymes	this study	this study		used for calibrating of "Ptros by PT calculator"; used for calibrating of "lazy Ptros by PT calculator"
9	Zeleniy Mys	ZM.16	68.995637, 33.052134	Barents Sea	Kola Bay	BL	2016	Brackish	tidal	57	0.807018	0.842105	0.978261	0.727273	0.9375	0.888889	12 — 25.3 (17.08)	4 allozymes	this study	this study		used for calibrating of "Ptros by PT calculator"
10	Kuvshinskaya Salma	Ku.12	69.303850, 33.415571	Barents Sea	Kola Bay	BH	2012	Saline	pier	40	0.55	0.9	0.909091	0.111111	0.555556	0.5	10.8 — 36.6 (22.82)	4 allozymes	this study	this study		used for calibrating of "genotype by morphotype calculator"
11	Bolshaya Volokovaya Guba	Vo.05	69.264898, 33.610993	Barents Sea	Kola Bay	BH	2005	Saline	tidal	65	0.646154	0.646154	0.761905	0.565217	0.761905	0.565217	14.5 — 57.2 (34.19)	4 allozymes	this study	this study
12	Mouth of Tyuva Guba	usSL.05	69.11611, 33.35042	Barents Sea	Kola Bay	BH	2005	Saline	tidal	45	0.844444	0.911111	0.973684	0.428571	0.902439	0.75	10.9 — 65.7 (36.08)	4 allozymes	this study	this study
13	Mouth of Tyuva Guba	usSL.12	69.11611, 33.35042	Barents Sea	Kola Bay	BH	2012	Saline	tidal	106	0.54717	0.773585	0.87931	0.354167	0.621951	0.708333	10.1 — 37.3 (19.17)	3 allozymes	this study	this study		used for calibrating of "genotype by morphotype calculator"
14	Mouth of Tyuva Guba	usSS.12	69.11611, 33.35042?	Barents Sea	Kola Bay	BH	2012	Saline	subtidal	119	0.319328	0.588235	0.72973	0.47561	0.385714	0.795918	10.3 — 92.3 (35.50)	3 allozymes	this study	this study
15	Central part of Tyva Guba	serNL.12	69.11723, 33.36145	Barents Sea	Kola Bay	BH	2012	Saline	tidal	98	0.571429	0.94898	0.982143	0.0952381	0.591398	0.8	8.2 — 48.5 (21.67)	3 allozymes	this study	this study		used for calibrating of "genotype by morphotype calculator"
16	Central part of Tyva Guba	serNS.12	69.11723, 33.36145?	Barents Sea	Kola Bay	BH	2012	Saline	subtidal	116	0.482759	0.681034	0.696429	0.333333	0.493671	0.540541	7.1 — 58.1 (31.61)	3 allozymes	this study	this study		used for calibrating of "genotype by morphotype calculator"
17	Top of Tyva Guba	bankSL.12	69.11096, 33.37666	Barents Sea	Kola Bay	BH	2012	Saline	tidal	84	0.0952381	0.511905	0.375	0.473684	0.0697674	0.878049	9.2 — 56.1 (31.29)	3 allozymes	this study	this study
18	Vtoroy Kovsh of Ivanovskaya Guba	Iv2.08	68.274332, 38.708501	Barents Sea	Eastern Murman	BL	2008	Brackish	tidal	51	0.117647	0.0784314	0.666667	1	1	0.957447	9 — 28.7 (16.44)	4 allozymes	this study	this study
19	Vtoroy Kovsh of Ivanovskaya Guba	Iv3.08	68.245452, 38.762673	Barents Sea	Eastern Murman	BL	2008	Brackish	tidal	52	0.769231	0.653846	0.825	0.916667	0.970588	0.611111	10.3 — 68.2 (30.39)	4 allozymes	this study	this study
20	Yokanga River	Yok.12	68.015010, 39.676212	Barents Sea	Eastern Murman	BL	2012	Brackish	tidal	59	0.237288	0.169492	0.642857	0.977778	0.9	0.897959	19.4 — 52.6 (32.07)	4 allozymes	this study	this study
21	Bukhtovka	Bu.12	67.983576, 40.022112	Barents Sea	Eastern Murman	BH	2012	Saline	tidal	40	0.225	0.625	0.777778	0.419355	0.28	0.866667	7.9 — 37.6 (22.80)	4 allozymes	this study	this study
22	Mouth of Ivanovskaya Guba	Iv0.05	68.346753, 38.498009	Barents Sea	Eastern Murman	BH	2005	Saline	mooring buoy	22	0.681818	1	1	0	0.681818	0	13.2 — 52.3 (28.11)	4 allozymes	this study	this study		used for calibrating of "lazy Ptros by PT calculator"
23	Mouth of Ivanovskaya Guba	Iv0.08	68.350366, 38.464863	Barents Sea	Eastern Murman	BH	2008	Saline	tidal	49	0.166667	0.333333	1	0.8	0.5	1	6.5 — 38 (18.99)	4 allozymes	this study	this study		used for calibrating of "lazy Ptros by PT calculator"
24	Yarnishnaya Guba	YaB.13	69.086296, 36.052752	Barents Sea	Eastern Murman	BH	2013	Saline	intertidal and shallow sublittoral zones	88	0.0909091	0.340909	0.875	0.7125	0.233333	0.982759	11.1 — 73.7 (28.59)	3 allozymes	this study	this study
25	Yarnishnaya Guba	YaL.13	69.087090, 36.054785	Barents Sea	Eastern Murman	BH	2013	Saline	tidal	89	0.0337079	0.52809	0.666667	0.476744	0.0425532	0.97619	12.1 — 58.3 (22.64)	3 allozymes	this study	this study
26	Yarnishny Ruchey	YaR.02	69.085598, 36.051686	Barents Sea	Eastern Murman	BH	2002	Saline	tidal	23	0.26087	0.565217	1	0.588235	0.461538	1	15.4 — 27.6 (22.76)	4 allozymes	Vainola, Strelkov 2011	this study
27	Kandalaksha, channel	Kan	67.15688, 32.37088	White Sea	Gulf of Kandalaksha	WS	2010	Brackish	tidal	46	0.891304	0.847826	0.853659	0.2	0.897436	0.142857	9.6 — 47.2 (21.63)	4 allozymes	Katolikova et al. 2016	Katolikova et al. 2016		used for calibrating of "Ptros by PT calculator"
28	Kandalaksha, Mouth of Niva river	Niv2	67.12882, 32.42505	White Sea	Gulf of Kandalaksha	WS	2011	Brackish	subtidal	41	0.439024	0.560976	0.888889	0.695652	0.695652	0.888889	10.1 — 39.5 (25.06)	4 allozymes	Katolikova et al. 2016	Katolikova et al. 2016		used for calibrating of "genotype by morphotype calculator"
29	Kandalaksha, Olenij Island	Ol	67.09485, 32.34515	White Sea	Gulf of Kandalaksha	WS	2010	Brackish	tidal	40	0.875	0.75	0.857143	1	1	0.5	8.1 — 45.9 (24.42)	4 allozymes	Katolikova et al. 2016	Katolikova et al. 2016		used for calibrating of "Ptros by PT calculator"
30	Kandalaksha, Salnaya Luda Island	Sal	67.12602, 32.36038	White Sea	Gulf of Kandalaksha	WS	2010	Brackish	tidal	39	0.945946	0.837838	0.885714	1	1	0.333333	10.8 — 46.9 (22.43)	4 allozymes	Katolikova et al. 2016	Katolikova et al. 2016		used for calibrating of "Ptros by PT calculator"
31	Outlet of the Kolvitca Bay	Kol	66.99567, 32.82042	White Sea	Gulf of Kandalaksha	WS	2011	Brackish	tidal	48	0.0869565	0.0652174	0.75	1	1	0.976744	12.4 — 39 (22.65)	4 allozymes	Katolikova et al. 2016	Katolikova et al. 2016		used for calibrating of "Ptros by PT calculator"
32	Padan Inlet	Pad	66.701026, 34.238944	White Sea	Gulf of Kandalaksha	WS	2006	Brackish	subtidal	31	0.0333333	0	0	1	0	0.966667	13.9 — 40.8 (30.49)	4 allozymes	Katolikova et al. 2016	Katolikova et al. 2016		used for calibrating of "Ptros by PT calculator"; used for calibrating of "lazy Ptros by PT calculator"
33	Porya Inlet	Por	66.756506, 33.781242	White Sea	Gulf of Kandalaksha	WS	2011	Brackish	tidal	42	0.146341	0.097561	0.666667	1	1	0.945946	12.2 — 50 (29.11)	4 allozymes	Katolikova et al. 2016	Katolikova et al. 2016
34	Luvenga Archipelago	Lu2	67.09889, 32.70194	White Sea	Gulf of Kandalaksha	WS	2004	Brackish	tidal	43	0.0697674	0.0465116	0.666667	1	1	0.97561	12.2 — 34.7 (21.35)	4 allozymes	Vainola, Strelkov 2011	Katolikova et al. 2016		used for calibrating of "Ptros by PT calculator"
35	Luvenga Archipelago	Lu3	67.113167, 32.642783	White Sea	Gulf of Kandalaksha	WS	2008	Brackish	tidal	48	0.125	0.208333	1	0.904762	0.6	1	14.6 — 34.9 (23.93)	4 allozymes	Katolikova et al. 2016	Katolikova et al. 2016
36	Umba, Bolshaya Pir Inlet	Bp1	66.677388, 34.372514	White Sea	Gulf of Kandalaksha	WS	2006	Brackish	tidal	38	0.114286	0.0285714	0.25	1	1	0.911765	23.8 — 45.2 (36.89)	4 allozymes	Katolikova et al. 2016	Katolikova et al. 2016
37	Umba, Bolshaya Pir Inlet	Bp2	66.696303, 34.352270	White Sea	Gulf of Kandalaksha	WS	2006	Brackish	tidal	30	0.32	0.12	0.375	1	1	0.772727	19.2 — 51.7 (34.47)	4 allozymes	Katolikova et al. 2016	Katolikova et al. 2016		used for calibrating of "genotype by morphotype calculator"
38	Umba, Bolshaya Pir Inlet	Bp3	66.655254, 34.339720	White Sea	Gulf of Kandalaksha	WS	2006	Brackish	tidal	40	0.025641	0	0	1	0	0.974359	14.8 — 41.8 (29.31)	4 allozymes	Katolikova et al. 2016	Katolikova et al. 2016		used for calibrating of "Ptros by PT calculator"
39	Umba, Malaya Pir Inlet	Mp1	66.66417, 34.32611	White Sea	Gulf of Kandalaksha	WS	2002	Brackish	tidal	44	0.772727	0.886364	1	0.5	0.871795	1	20.8 — 38.2 (30.42)	4 allozymes	Vainola, Strelkov 2011	Katolikova et al. 2016		used for calibrating of "lazy Ptros by PT calculator"
40	Umba, Malaya Pir Inlet	Mp2	66.68556, 34.33583	White Sea	Gulf of Kandalaksha	WS	2004	Brackish	tidal	20	0	0	-	1	-	1	19.7 — 40.6 (30.03)	4 allozymes	Vainola, Strelkov 2011	Katolikova et al. 2016		used for calibrating of "Ptros by PT calculator"
41	Umba, Malaya Pir Inlet	Mp3	66.683231, 34.333758	White Sea	Gulf of Kandalaksha	WS	2006	Brackish	tidal	43	0	0	-	1	-	1	12.2 — 32.2 (21.19)	4 allozymes	Katolikova et al. 2016	Katolikova et al. 2016		used for calibrating of "Ptros by PT calculator"
42	Umba, Malaya Pir Inlet, Umba harbor	Um	66.668867, 34.328305	White Sea	Gulf of Kandalaksha	WS	2013	Brackish	tidal	105	0.495238	0.438095	0.711538	0.830189	0.804348	0.745763	10.4 — 53.3 (33.87)	4 allozymes	Katolikova et al. 2016	Katolikova et al. 2016		used for calibrating of "genotype by morphotype calculator"
43	Umba river	Umb	66.664503, 34.298491	White Sea	Gulf of Kandalaksha	WS	2006	Brackish	subtidal	29	0	0	-	1	-	1	27.1 — 50.3 (36.95)	4 allozymes	Katolikova et al. 2016	Katolikova et al. 2016		used for calibrating of "Ptros by PT calculator"
44	Voronjya Inlet	Vor1	67.934533, 32.50695	White Sea	Gulf of Kandalaksha	WS	2008	Brackish	tidal	43	0.0697674	0.209302	0.333333	0.8	0.111111	0.941176	12.2 — 35.7 (24.36)	4 allozymes	Katolikova et al. 2016	Katolikova et al. 2016		used for calibrating of "Ptros by PT calculator"
45	Voronjya Inlet	Vor2	67.941, 32.434267	White Sea	Gulf of Kandalaksha	WS	2008	Brackish	tidal	39	0.0512821	0	0	1	0	0.948718	11 — 36.8 (24.34)	4 allozymes	Katolikova et al. 2016	Katolikova et al. 2016		used for calibrating of "Ptros by PT calculator"
46	Voronjya Inlet	Vor3	67.927883, 32.491083	White Sea	Gulf of Kandalaksha	WS	2008	Brackish	tidal	43	0.0465116	0.0697674	1	0.97561	0.666667	1	12.8 — 36.4 (24.70)	4 allozymes	Katolikova et al. 2016	Katolikova et al. 2016		used for calibrating of "Ptros by PT calculator"
47	Voronjya Inlet	Vor4	67.934533, 32.50695	White Sea	Gulf of Kandalaksha	WS	2011	Brackish	tidal	46	0.152174	0.108696	0.714286	1	1	0.95122	8.3 — 42.8 (25.81)	4 allozymes	Katolikova et al. 2016	Katolikova et al. 2016
48	Kovda Inlet	Kov	66.865, 33.08944	White Sea	Gulf of Kandalaksha	WS	2011	Brackish	tidal	49	0.166667	0.125	0.75	1	1	0.952381	10.2 — 57.6 (29.37)	4 allozymes	Katolikova et al. 2016	Katolikova et al. 2016
49	Ryazhkov Island	Rya	67.00815, 32.57235	White Sea	Gulf of Kandalaksha	WS	2011	Brackish	tidal	74	0.378378	0.554054	0.821429	0.608696	0.560976	0.848485	11.5 — 47.3 (27.04)	4 allozymes	Katolikova et al. 2016	Katolikova et al. 2016
50	Chupa Inlet, Chupa harbor	Ch	66.270398, 33.068441	White Sea	Gulf of Kandalaksha	WS	2013	Brackish	tidal	84	0.702381	0.380952	0.491525	0.88	0.90625	0.423077	8.5 — 41.5 (22.18)	4 allozymes	Katolikova et al. 2016	Katolikova et al. 2016
51	Vinalhaven	VH	44.040389, -68.853389	NW Atlantic	Gulf of Maine	GOM	2014	Saline	intertidal and shallow sublittoral zones	75	0	0	-	1	-	1	48.4 — 67.8 (57.96)	109 260 SNP	Kingston et al. 2018	this study		used for calibrating of "Ptros by PT calculator"
52	Phippsburg The Basin	PH	43.798389, -69.852044	NW Atlantic	Gulf of Maine	GOM	2014	Saline	intertidal and shallow sublittoral zones	29	0	0.137931	-	0.862069	0	1	32.9 — 55.9 (44.84)	109 260 SNP	Kingston et al. 2018	this study		used for calibrating of "Ptros by PT calculator"
53	Bailey Island	BI	43.723778, -69.993333	NW Atlantic	Gulf of Maine	GOM	2014	Saline	intertidal and shallow sublittoral zones	23	0.0434783	0.0434783	1	1	1	1	33.5 — 48.4 (38.69)	109 260 SNP	Kingston et al. 2018	this study		used for calibrating of "Ptros by PT calculator"
54	Mount Desert Rock East	MDRE	43.968621, -68.128314	NW Atlantic	Gulf of Maine	GOM	2014	Saline	intertidal and shallow sublittoral zones	24	0.208333	0.25	1	0.947368	0.833333	1	27.5 — 44.8 (35.59)	109 260 SNP	Kingston et al. 2018	this study
55	Mount Desert Rock West	MDRW	43.968621, -68.128314	NW Atlantic	Gulf of Maine	GOM	2014	Saline	intertidal and shallow sublittoral zones	32	0.25	0.15625	0.5	0.958333	0.8	0.851852	16 — 42.9 (25.80)	109 260 SNP	Kingston et al. 2018	this study
56	Cobscook Bay Comstock Point	CBCP	44.887528, -67.01975	NW Atlantic	Gulf of Maine	GOM	2014	Saline	intertidal and shallow sublittoral zones	41	0.682927	0	0	1	-	0.317073	40.9 — 56.7 (48.25)	109 260 SNP	Kingston et al. 2018	this study		used for calibrating of "lazy Ptros by PT calculator"
57	Cobscook Bay Smalls Cove	CBSC	44.885962, -67.022185	NW Atlantic	Gulf of Maine	GOM	2014	Saline	intertidal and shallow sublittoral zones	18	0.222222	0.0555556	0	0.928571	0	0.764706	45.9 — 62.6 (56.46)	109 260 SNP	Kingston et al. 2018	this study
58	Cobscook Bay Eastport	CBE	44.893883, -67.001248	NW Atlantic	Gulf of Maine	GOM	2014	Saline	intertidal and shallow sublittoral zones	36	0.972222	0.722222	0.714286	0	0.961538	0	35.5 — 63 (48.73)	109 260 SNP	Kingston et al. 2018	this study		used for calibrating of "Ptros by PT calculator"; used for calibrating of "lazy Ptros by PT calculator"
59	Cobscook Bay South Lubec	CBSL	44.858151, -66.981904	NW Atlantic	Gulf of Maine	GOM	2015	Saline	intertidal and shallow sublittoral zones	33	0.575758	0.424242	0.684211	0.928571	0.928571	0.684211	36.8 — 66.9 (52.37)	109 260 SNP	this study; Martino et al. 2019	this study		used for calibrating of "genotype by morphotype calculator"
60	Jonesport Central	JPC	44.528468, -67.619748	NW Atlantic	Gulf of Maine	GOM	2015	Saline	intertidal and shallow sublittoral zones	50	0	0.02	-	0.98	0	1	38.3 — 62.7 (52.85)	109 260 SNP	this study; Martino et al. 2019	this study		used for calibrating of "Ptros by PT calculator"
61	Mount Desert Island College of the Atlantic	MDIACOA	44.395905, -68.22036	NW Atlantic	Gulf of Maine	GOM	2015	Saline	intertidal and shallow sublittoral zones	35	0	0.0285714	-	0.971429	0	1	43.5 — 80.9 (69.29)	109 260 SNP	this study	this study		used for calibrating of "Ptros by PT calculator"
62	Kent Island Mooring	KIM	44.588711, -66.761891	NW Atlantic	Gulf of Maine	GOM	2015	Saline	intertidal and shallow sublittoral zones	32	0.03125	0.0625	1	0.967742	0.5	1	43.1 — 87.8 (71.89)	109 260 SNP	this study; Martino et al. 2019	this study		used for calibrating of "Ptros by PT calculator"
63	Vikhög, Sweden	Vhg88	55.4342, 12.5533	Baltic Sea	Oresund Strait	BALT	1988	Brackish	subtidal	108	0.82	0.206897	0.27	0.84	0.89	0.2	11.4 — 38.7 (21.57)	4 allozymes	this study	this study
64	Vikhög, Sweden	Vhg05	55.4342, 12.5533	Baltic Sea	Oresund Strait	BALT	2005	Brackish	subtidal	51	0.45	0.037037	0.09	1	1	0.57	5 — 26.6 (16.06)	4 allozymes	Strelkov et al. 2017	this study		used for calibrating of "genotype by morphotype calculator"
65	Kastrup, Denmark	Kast87	55.3823, 12.3918	Baltic Sea	Oresund Strait	BALT	1987	Brackish	subtidal	78	0.448718	0.0641026	0.114286	0.976744	0.8	0.575342	10.9 — 42.4 (21.44)	4 allozymes	Strelkov et al. 2017	this study		used for calibrating of "genotype by morphotype calculator"
66	Kastrup, Denmark	Kast05	55.3823, 12.3918	Baltic Sea	Oresund Strait	BALT	2005	Brackish	subtidal	64	0.0909091	0	0	1	0.909091	0.897436	7 — 48 (30.01)	4 allozymes	Strelkov et al. 2017	this study		used for calibrating of "Ptros by PT calculator"; used for calibrating of "lazy Ptros by PT calculator"
67	Limhamn, Sweden	Limh88	55.3524, 12.5517	Baltic Sea	Oresund Strait	BALT	1988	Brackish	subtidal	115	0.752137	0.034188	0.0454545	1	1	0.256637	14.3 — 37.9 (22.51)	4 allozymes	this study	this study
68	Limhamn, Sweden	Limh08	55.3524, 12.5517	Baltic Sea	Oresund Strait	BALT	2008	Brackish	subtidal	119	0.35	0.0446429	0.05	0.986667	0.67	0.66	4.1 — 45 (19.96)	4 allozymes	Strelkov et al. 2017	this study
69	Ystad, Sweden	Yst	55.2546, 13.4922	Baltic Sea	Baltic Proper	BALT	2005	Brackish	subtidal	31	0.981818	0.218182	0.222222	1	1	0.0232558	8.9 — 32.7 (22.90)	4 allozymes	Strelkov et al. 2017	this study		used for calibrating of "Ptros by PT calculator"
70	Solvesborg, Sweden	Solv	56.0133, 14.3345	Baltic Sea	Baltic Proper	BALT	1987	Brackish	subtidal	35	1	0.371429	0.371429	-	1	0	14.7 — 29.1 (20.52)	4 allozymes	Vainola, Strelkov 2011	this study		used for calibrating of "Ptros by PT calculator"; used for calibrating of "lazy Ptros by PT calculator"
71	Espeland, Marine Biology Station	Esp01	60.1610, 5.1320	North Sea	Western Norway	NORW	2001	Saline	tidal	48	0.0625	0	0	1	-	0.94	23.4 — 46 (34.07)	4 allozymes	Vainola, Strelkov 2011	this study		used for calibrating of "Ptros by PT calculator"; used for calibrating of "genotype by morphotype calculator" ; used for calibrating of "lazy Ptros by PT calculator"
72	Espeland, Marine Biology Station	Esp05	60.1610, 5.1320	North Sea	Western Norway	NORW	2005	Saline	tidal	27	0.11	0.26	0.67	0.79	0.285714	0.95	10.5 — 38.8 (21.94)	4 allozymes	this study	this study		used for calibrating of "genotype by morphotype calculator"
73	Bergen, city harbor	Berg04	60.2249, 5.2008	North Sea	Western Norway	NORW	2004	Brackish	tidal	72	0.694444	0.01	0.02	1	1	0.31	26.4 — 51.1 (41.22)	4 allozymes	Vainola, Strelkov 2011	this study		used for calibrating of "genotype by morphotype calculator"
74	Bergen, city harbor	Berg05	60.2249, 5.2008	North Sea	Western Norway	NORW	2005	Brackish	tidal	173	0.82	0.47	0.56	0.94	0.975309	0.326087	5.5 — 64.3 (24.17)	4 allozymes	this study	this study		used for calibrating of "Ptros by PT calculator"; used for calibrating of "genotype by morphotype calculator" ; used for calibrating of "lazy Ptros by PT calculator"
75	Bergen, city harbor	Berg16	60.2249, 5.2008	North Sea	Western Norway	NORW	2016	Brackish	tidal	45	0.622222	0.29	0.46	1	1	0.53	14.7 — 42.1 (32.21)	4 allozymes	this study	this study		used for calibrating of "genotype by morphotype calculator"
76	Plantation	PL	56.45564, -5.3083	off the West Coast of Scotland	Loch Etive	SCOT	2011	Brackish	subtidal	100	0.86	0.84	0.94	0.79	0.96	0.69	14.4 — 32 (22.45)	4 allozymes	this study	this study		used for calibrating of "Ptros by PT calculator"; used for calibrating of "genotype by morphotype calculator"
77	Loch Etive	LE	56.45381, -5.31182	off the West Coast of Scotland	Loch Etive	SCOT	2011	Brackish	tidal	60	0.05	0	0	1	-	0.95	27.3 — 61.1 (48.27)	4 allozymes	this study	this study		used for calibrating of "Ptros by PT calculator"; used for calibrating of "genotype by morphotype calculator"
	References
	Väinölä, R. and Strelkov, P., 2011. Mytilus trossulus in northern Europe. Marine biology, 158(4), pp.817-833.
	Katolikova, M., Khaitov, V., Väinölä, R., Gantsevich, M. and Strelkov, P., 2016. Genetic, ecological and morphological distinctness of the blue mussels Mytilus trossulus Gould and M. edulis L. in the White Sea. PLoS One, 11(4).
	Kingston, S.E., Martino, P., Melendy, M., Reed, F.A. and Carlon, D.B., 2018. Linking genotype to phenotype in a changing ocean: inferring the genomic architecture of a blue mussel stress response with genome‐wide association. Journal of evolutionary biology, 31(3), pp.346-361.
	Martino, P.A., Carlon, D.B. and Kingston, S.E., 2019. Blue Mussel (Genus Mytilus) Transcriptome Response to Simulated Climate Change in the Gulf of Maine. Journal of Shellfish Research, 38(3), pp.587-602.
	Strelkov, P., Katolikova, M., & Väinolä, R. (2017). Temporal change of the Baltic Sea–North Sea blue mussel hybrid zone over two decades. Marine Biology, 164(11), 214.
